## Correction

# Correction: Genome-Wide Association Study of Gene by Smoking Interactions in Coronary Artery Calcification

## The PLOS ONE Staff

In the Methods section, under Data Analysis, there is an error in the equation. The equation listed in both the online and PDF versions of this article is incorrect. Please view the complete, correct equation here:

$$(\beta_{\text{smokers}} - \beta_{\text{nonsmokers}}) / \sqrt{(se_{\text{smokers}}^2 + se_{\text{nonsmokers}}^2)}$$

## Reference

1. Polfus LM, Smith JA, Shimmin LC, Bielak LF, Morrison AC, et al. (2013) Genome-Wide Association Study of Gene by Smoking Interactions in Coronary Artery Calcification. PLoS ONE 8(10): e74642. doi:10.1371/journal.pone.0074642

---

**Citation:** The PLOS ONE Staff (2014) Correction: Genome-Wide Association Study of Gene by Smoking Interactions in Coronary Artery Calcification. PLoS ONE 9(4): e93722. doi:10.1371/journal.pone.0093722

**Published:** April 3, 2014

**Copyright:** © 2014 The PLOS ONE Staff. This is an open-access article distributed under the terms of the Creative Commons Attribution License, which permits unrestricted use, distribution, and reproduction in any medium, provided the original author and source are credited.
